# Supplementary material for: Genome-Wide Analysis and Exploration of WRKY Transcription Factor Family Involved in the Regulation of Shoot Branching in Petunia
Source: MDPI journal article supplement (doi:10.3390/genes13050855), 2022-05-11
Supplement: s1 [file s1]

| Accession number         | Gene name | Subcellular localization | Number of amino acids | Isoelectric point | Molecular weight | Molecular formula                                                                       |
|--------------------------|-----------|--------------------------|-----------------------|-------------------|------------------|-----------------------------------------------------------------------------------------|
| Peinf101Scf00055g17013.1 | PhWRKY1   | Nucleus                  | 741                   | 5.96              | 80217.87         | C <sub>3444</sub> H <sub>5334</sub> N <sub>1026</sub> O <sub>1146</sub> S <sub>24</sub> |
| Peinf101Scf01201g03016.1 | PhWRKY2   | Nucleus                  | 479                   | 7.62              | 53467.68         | C <sub>2351</sub> H <sub>3652</sub> N <sub>660</sub> O <sub>741</sub> S <sub>14</sub>   |
| Peinf101Scf00231g01029.1 | PhWRKY3   | Nucleus                  | 461                   | 6.41              | 50554.87         | C <sub>2182</sub> H <sub>3421</sub> N <sub>641</sub> O <sub>717</sub> S <sub>14</sub>   |
| Peinf101Scf01969g05034.1 | PhWRKY4   | Nucleus                  | 461                   | 6.84              | 51786.12         | C <sub>2254</sub> H <sub>3544</sub> N <sub>632</sub> O <sub>722</sub> S <sub>23</sub>   |
| Peinf101Scf00898g01016.1 | PhWRKY5   | Nucleus                  | 507                   | 6.84              | 55393.85         | C <sub>2375</sub> H <sub>3727</sub> N <sub>703</sub> O <sub>799</sub> S <sub>15</sub>   |
| Peinf101Scf00923g03009.1 | PhWRKY6   | Nucleus                  | 539                   | 6.56              | 60169.56         | C <sub>2598</sub> H <sub>4122</sub> N <sub>766</sub> O <sub>826</sub> S <sub>27</sub>   |
| Peinf101Scf01179g02021.1 | PhWRKY7   | Nucleus                  | 340                   | 9.64              | 37933.63         | C <sub>1638</sub> H <sub>2621</sub> N <sub>497</sub> O <sub>515</sub> S <sub>13</sub>   |
| Peinf101Scf00949g01005.1 | PhWRKY8   | Nucleus                  | 375                   | 9.59              | 41547.69         | C <sub>1794</sub> H <sub>2871</sub> N <sub>537</sub> O <sub>569</sub> S <sub>15</sub>   |
| Peinf101Scf00255g03015.1 | PhWRKY9   | Nucleus                  | 486                   | 6.29              | 53512.31         | C <sub>2282</sub> H <sub>3635</sub> N <sub>679</sub> O <sub>766</sub> S <sub>21</sub>   |
| Peinf101Scf00276g07026.1 | PhWRKY10  | Nucleus                  | 304                   | 9.62              | 33135.67         | C <sub>1440</sub> H <sub>2318</sub> N <sub>426</sub> O <sub>443</sub> S <sub>14</sub>   |
| Peinf101Scf00146g01031.1 | PhWRKY11  | Nucleus                  | 303                   | 9.86              | 32857.45         | C <sub>1424</sub> H <sub>2312</sub> N <sub>434</sub> O <sub>433</sub> S <sub>13</sub>   |
| Peinf101Scf01786g02023.1 | PhWRKY12  | Nucleus                  | 193                   | 9.26              | 21957.43         | C <sub>946</sub> H <sub>1483</sub> N <sub>291</sub> O <sub>298</sub> S <sub>8</sub>     |
| Peinf101Scf00239g16004.1 | PhWRKY13  | Nucleus                  | 228                   | 9.14              | 26300.67         | C <sub>1156</sub> H <sub>1809</sub> N <sub>337</sub> O <sub>349</sub> S <sub>9</sub>    |
| Peinf101Scf01724g02031.1 | PhWRKY14  | Nucleus                  | 244                   | 4.94              | 27492.43         | C <sub>1206</sub> H <sub>1854</sub> N <sub>320</sub> O <sub>398</sub> S <sub>9</sub>    |
| Peinf101Scf00887g05031.1 | PhWRKY15  | Nucleus                  | 316                   | 9.59              | 35256.13         | C <sub>1525</sub> H <sub>2480</sub> N <sub>446</sub> O <sub>480</sub> S <sub>16</sub>   |
| Peinf101Scf00748g00019.1 | PhWRKY16  | Nucleus                  | 336                   | 9.38              | 37424.77         | C <sub>1631</sub> H <sub>2634</sub> N <sub>468</sub> O <sub>503</sub> S <sub>18</sub>   |
| Peinf101Scf00883g11015.1 | PhWRKY17  | Nucleus                  | 235                   | 6.89              | 26740.26         | C <sub>1137</sub> H <sub>1757</sub> N <sub>353</sub> O <sub>376</sub> S <sub>11</sub>   |
| Peinf101Scf00256g12020.1 | PhWRKY18  | Nucleus                  | 337                   | 6.71              | 37664.86         | C <sub>1619</sub> H <sub>2565</sub> N <sub>481</sub> O <sub>530</sub> S <sub>13</sub>   |
| Peinf101Scf01468g07025.1 | PhWRKY19  | Nucleus                  | 226                   | 8.97              | 25723.02         | C <sub>1125</sub> H <sub>1746</sub> N <sub>320</sub> O <sub>345</sub> S <sub>14</sub>   |
| Peinf101Scf00022g02026.1 | PhWRKY20  | Nucleus                  | 583                   | 6.42              | 62857.70         | C <sub>2702</sub> H <sub>4268</sub> N <sub>792</sub> O <sub>894</sub> S <sub>22</sub>   |
| Peinf101Scf01997g00005.1 | PhWRKY21  | Nucleus                  | 333                   | 6.17              | 36939.62         | C <sub>1587</sub> H <sub>2445</sub> N <sub>463</sub> O <sub>526</sub> S <sub>16</sub>   |
| Peinf101Scf00355g03016.1 | PhWRKY22  | Nucleus                  | 352                   | 5.68              | 38910.97         | C <sub>1676</sub> H <sub>2624</sub> N <sub>486</sub> O <sub>557</sub> S <sub>13</sub>   |
| Peinf101Scf00244g18025.1 | PhWRKY23  | Nucleus                  | 302                   | 6.39              | 33685.60         | C <sub>1469</sub> H <sub>2288</sub> N <sub>406</sub> O <sub>475</sub> S <sub>14</sub>   |
| Peinf101Scf00450g00007.1 | PhWRKY24  | Nucleus                  | 564                   | 6.65              | 62355.24         | C <sub>2685</sub> H <sub>4145</sub> N <sub>775</sub> O <sub>904</sub> S <sub>19</sub>   |
| Peinf101Scf00962g16030.1 | PhWRKY25  | Nucleus                  | 314                   | 5.11              | 35577.78         | C <sub>1561</sub> H <sub>2406</sub> N <sub>416</sub> O <sub>502</sub> S <sub>17</sub>   |
| Peinf101Scf00782g10028.1 | PhWRKY26  | Nucleus                  | 548                   | 8.13              | 60836.47         | C <sub>2614</sub> H <sub>4030</sub> N <sub>762</sub> O <sub>881</sub> S <sub>19</sub>   |

|                          |          |         |     |      |          |                                                                                       |
|--------------------------|----------|---------|-----|------|----------|---------------------------------------------------------------------------------------|
| Peinfl01Scf01632g07037.1 | PhWRKY27 | Nucleus | 396 | 5.28 | 44534.07 | C <sub>1972</sub> H <sub>3056</sub> N <sub>534</sub> O <sub>613</sub> S <sub>15</sub> |
| Peinfl01Scf00665g17027.1 | PhWRKY28 | Nucleus | 334 | 7.56 | 37815.72 | C <sub>1639</sub> H <sub>2510</sub> N <sub>466</sub> O <sub>535</sub> S <sub>16</sub> |
| Peinfl01Scf03679g05006.1 | PhWRKY29 | Nucleus | 245 | 8.14 | 28577.68 | C <sub>1237</sub> H <sub>1922</sub> N <sub>366</sub> O <sub>396</sub> S <sub>10</sub> |
| Peinfl01Scf01632g03025.1 | PhWRKY30 | Nucleus | 347 | 5.66 | 38612.28 | C <sub>1665</sub> H <sub>2542</sub> N <sub>480</sub> O <sub>553</sub> S <sub>15</sub> |
| Peinfl01Scf00039g14008.1 | PhWRKY31 | Nucleus | 584 | 6.02 | 63221.31 | C <sub>2707</sub> H <sub>4285</sub> N <sub>793</sub> O <sub>897</sub> S <sub>29</sub> |
| Peinfl01Scf00614g00012.1 | PhWRKY32 | Nucleus | 517 | 7.01 | 56800.34 | C <sub>2423</sub> H <sub>3911</sub> N <sub>725</sub> O <sub>808</sub> S <sub>21</sub> |
| Peinfl01Scf00071g01019.1 | PhWRKY33 | Nucleus | 583 | 6.24 | 63112.70 | C <sub>2699</sub> H <sub>4257</sub> N <sub>801</sub> O <sub>903</sub> S <sub>23</sub> |
| Peinfl01Scf00519g04010.1 | PhWRKY34 | Nucleus | 609 | 5.90 | 67324.53 | C <sub>2887</sub> H <sub>4546</sub> N <sub>850</sub> O <sub>958</sub> S <sub>26</sub> |
| Peinfl01Scf00423g15008.1 | PhWRKY35 | Nucleus | 488 | 5.80 | 52907.89 | C <sub>2257</sub> H <sub>3526</sub> N <sub>664</sub> O <sub>773</sub> S <sub>18</sub> |
| Peinfl01Scf01775g01023.1 | PhWRKY36 | Nucleus | 549 | 5.83 | 59467.43 | C <sub>2519</sub> H <sub>4054</sub> N <sub>752</sub> O <sub>878</sub> S <sub>17</sub> |
| Peinfl01Scf01889g05028.1 | PhWRKY37 | Nucleus | 321 | 8.35 | 35691.89 | C <sub>1534</sub> H <sub>2460</sub> N <sub>440</sub> O <sub>511</sub> S <sub>14</sub> |
| Peinfl01Scf02382g03038.1 | PhWRKY38 | Nucleus | 355 | 5.45 | 40136.18 | C <sub>1758</sub> H <sub>2676</sub> N <sub>480</sub> O <sub>576</sub> S <sub>12</sub> |
| Peinfl01Scf00571g28006.1 | PhWRKY39 | Nucleus | 345 | 9.63 | 38680.77 | C <sub>1660</sub> H <sub>2679</sub> N <sub>517</sub> O <sub>514</sub> S <sub>18</sub> |
| Peinfl01Scf01580g05011.1 | PhWRKY40 | Nucleus | 262 | 6.08 | 29667.10 | C <sub>1284</sub> H <sub>2030</sub> N <sub>366</sub> O <sub>420</sub> S <sub>11</sub> |
| Peinfl01Scf00962g23035.1 | PhWRKY41 | Nucleus | 337 | 5.14 | 38214.23 | C <sub>1665</sub> H <sub>2536</sub> N <sub>460</sub> O <sub>542</sub> S <sub>17</sub> |
| Peinfl01Scf01579g02011.1 | PhWRKY42 | Nucleus | 622 | 6.16 | 67710.50 | C <sub>2876</sub> H <sub>4516</sub> N <sub>872</sub> O <sub>967</sub> S <sub>29</sub> |
| Peinfl01Scf00962g16031.1 | PhWRKY43 | Nucleus | 207 | 9.04 | 23751.12 | C <sub>1041</sub> H <sub>1628</sub> N <sub>302</sub> O <sub>306</sub> S <sub>15</sub> |
| Peinfl01Scf00457g28014.1 | PhWRKY44 | Nucleus | 493 | 9.19 | 55044.51 | C <sub>2362</sub> H <sub>3789</sub> N <sub>711</sub> O <sub>768</sub> S <sub>19</sub> |
| Peinfl01Scf01192g04049.1 | PhWRKY45 | Nucleus | 169 | 9.40 | 19389.75 | C <sub>840</sub> H <sub>1324</sub> N <sub>250</sub> O <sub>263</sub> S <sub>8</sub>   |
| Peinfl01Scf01109g09006.1 | PhWRKY46 | Nucleus | 264 | 6.66 | 29317.28 | C <sub>1253</sub> H <sub>1939</sub> N <sub>357</sub> O <sub>425</sub> S <sub>16</sub> |
| Peinfl01Scf01169g01016.1 | PhWRKY47 | Nucleus | 304 | 5.11 | 33910.75 | C <sub>1483</sub> H <sub>2275</sub> N <sub>403</sub> O <sub>478</sub> S <sub>16</sub> |
| Peinfl01Scf00078g04017.1 | PhWRKY48 | Nucleus | 332 | 6.55 | 36954.85 | C <sub>1603</sub> H <sub>2490</sub> N <sub>454</sub> O <sub>528</sub> S <sub>12</sub> |
| Peinfl01Scf00985g06014.1 | PhWRKY49 | Nucleus | 278 | 5.24 | 31222.74 | C <sub>1368</sub> H <sub>2108</sub> N <sub>364</sub> O <sub>447</sub> S <sub>13</sub> |
| Peinfl01Scf02382g03051.1 | PhWRKY50 | Nucleus | 296 | 7.06 | 32490.35 | C <sub>1409</sub> H <sub>2222</sub> N <sub>394</sub> O <sub>460</sub> S <sub>14</sub> |
| Peinfl01Scf00381g17007.1 | PhWRKY51 | Nucleus | 241 | 6.58 | 27812.13 | C <sub>1240</sub> H <sub>1863</sub> N <sub>329</sub> O <sub>378</sub> S <sub>12</sub> |
| Peinfl01Scf01602g02010.1 | PhWRKY52 | Nucleus | 345 | 6.11 | 38895.74 | C <sub>1713</sub> H <sub>2700</sub> N <sub>466</sub> O <sub>545</sub> S <sub>11</sub> |
| Peinfl01Scf00122g02023.1 | PhWRKY53 | Nucleus | 244 | 6.02 | 27394.87 | C <sub>1189</sub> H <sub>1880</sub> N <sub>328</sub> O <sub>384</sub> S <sub>15</sub> |
| Peinfl01Scf13097g00003.1 | PhWRKY54 | Nucleus | 81  | 9.90 | 9577.91  | C <sub>422</sub> H <sub>661</sub> N <sub>127</sub> O <sub>121</sub> S <sub>4</sub>    |
| Peinfl01Scf00339g01023.1 | PhWRKY55 | Nucleus | 243 | 6.13 | 27816.09 | C <sub>1214</sub> H <sub>1863</sub> N <sub>347</sub> O <sub>378</sub> S <sub>14</sub> |

---

|                          |          |         |     |      |          |                                                                                       |
|--------------------------|----------|---------|-----|------|----------|---------------------------------------------------------------------------------------|
| Peinfl01Scf02382g04035.1 | PhWRKY56 | Nucleus | 294 | 6.41 | 33143.03 | C <sub>1460</sub> H <sub>2266</sub> N <sub>396</sub> O <sub>466</sub> S <sub>10</sub> |
| Peinfl01Scf01631g01036.1 | PhWRKY57 | Nucleus | 311 | 5.76 | 34040.32 | C <sub>1462</sub> H <sub>2285</sub> N <sub>425</sub> O <sub>496</sub> S <sub>9</sub>  |
| Peinfl01Scf01214g04036.1 | PhWRKY58 | Nucleus | 492 | 6.60 | 54321.64 | C <sub>2362</sub> H <sub>3695</sub> N <sub>673</sub> O <sub>758</sub> S <sub>21</sub> |
| Peinfl01Scf02876g00007.1 | PhWRKY59 | Nucleus | 197 | 8.66 | 22945.50 | C <sub>1011</sub> H <sub>1544</sub> N <sub>274</sub> O <sub>322</sub> S <sub>8</sub>  |
| Peinfl01Scf00191g46015.1 | PhWRKY60 | Nucleus | 300 | 6.12 | 34348.16 | C <sub>1494</sub> H <sub>2322</sub> N <sub>418</sub> O <sub>487</sub> S <sub>13</sub> |
| Peinfl01Scf02160g04021.1 | PhWRKY61 | Nucleus | 543 | 6.87 | 59889.60 | C <sub>2560</sub> H <sub>4097</sub> N <sub>745</sub> O <sub>863</sub> S <sub>24</sub> |
| Peinfl01Scf02687g00042.1 | PhWRKY62 | Nucleus | 300 | 6.42 | 34628.61 | C <sub>1516</sub> H <sub>2350</sub> N <sub>424</sub> O <sub>483</sub> S <sub>12</sub> |
| Peinfl01Scf00782g02035.1 | PhWRKY63 | Nucleus | 308 | 5.64 | 34744.77 | C <sub>1512</sub> H <sub>2374</sub> N <sub>418</sub> O <sub>495</sub> S <sub>13</sub> |
| Peinfl01Scf01619g01001.1 | PhWRKY64 | Nucleus | 219 | 6.82 | 24944.33 | C <sub>1082</sub> H <sub>1635</sub> N <sub>307</sub> O <sub>355</sub> S <sub>10</sub> |
| Peinfl01Scf00102g02002.1 | PhWRKY65 | Nucleus | 306 | 6.05 | 34171.81 | C <sub>1454</sub> H <sub>2294</sub> N <sub>420</sub> O <sub>496</sub> S <sub>18</sub> |
| Peinfl01Scf01142g06005.1 | PhWRKY66 | Nucleus | 348 | 8.59 | 38505.78 | C <sub>1633</sub> H <sub>2653</sub> N <sub>485</sub> O <sub>561</sub> S <sub>14</sub> |
| Peinfl01Scf02687g00049.1 | PhWRKY67 | Nucleus | 188 | 5.15 | 20896.28 | C <sub>914</sub> H <sub>1395</sub> N <sub>249</sub> O <sub>292</sub> S <sub>11</sub>  |
| Peinfl01Scf00192g00019.1 | PhWRKY68 | Nucleus | 543 | 5.58 | 61394.29 | C <sub>2668</sub> H <sub>4118</sub> N <sub>724</sub> O <sub>877</sub> S <sub>32</sub> |
| Peinfl01Scf00442g03028.1 | PhWRKY69 | Nucleus | 280 | 5.63 | 30462.63 | C <sub>1307</sub> H <sub>2031</sub> N <sub>371</sub> O <sub>440</sub> S <sub>15</sub> |
| Peinfl01Scf00192g00020.1 | PhWRKY70 | Nucleus | 329 | 5.77 | 37138.58 | C <sub>1610</sub> H <sub>2515</sub> N <sub>441</sub> O <sub>526</sub> S <sub>21</sub> |
| Peinfl01Scf00040g09006.1 | PhWRKY71 | Nucleus | 352 | 6.78 | 39578.71 | C <sub>1722</sub> H <sub>2629</sub> N <sub>487</sub> O <sub>557</sub> S <sub>16</sub> |
| Peinfl01Scf00974g18005.1 | PhWRKY72 | Nucleus | 483 | 6.35 | 53519.64 | C <sub>2309</sub> H <sub>3688</sub> N <sub>656</sub> O <sub>771</sub> S <sub>17</sub> |
| Peinfl01Scf00889g03041.1 | PhWRKY73 | Nucleus | 159 | 9.08 | 18148.20 | C <sub>784</sub> H <sub>1224</sub> N <sub>228</sub> O <sub>253</sub> S <sub>8</sub>   |
| Peinfl01Scf01061g09001.1 | PhWRKY74 | Nucleus | 264 | 9.48 | 29326.45 | C <sub>1255</sub> H <sub>2043</sub> N <sub>393</sub> O <sub>384</sub> S <sub>17</sub> |
| Peinfl01Scf00052g06026.1 | PhWRKY75 | Nucleus | 174 | 9.27 | 20317.78 | C <sub>876</sub> H <sub>1369</sub> N <sub>257</sub> O <sub>277</sub> S <sub>12</sub>  |
| Peinfl01Scf00049g07032.1 | PhWRKY76 | Nucleus | 239 | 8.85 | 27065.47 | C <sub>1155</sub> H <sub>1873</sub> N <sub>341</sub> O <sub>380</sub> S <sub>14</sub> |
| Peinfl01Scf01200g03007.1 | PhWRKY77 | Nucleus | 536 | 6.36 | 58740.76 | C <sub>2518</sub> H <sub>4009</sub> N <sub>743</sub> O <sub>820</sub> S <sub>29</sub> |
| Peinfl01Scf00339g02023.1 | PhWRKY78 | Nucleus | 246 | 4.80 | 28302.63 | C <sub>1263</sub> H <sub>1933</sub> N <sub>321</sub> O <sub>402</sub> S <sub>8</sub>  |
| Peinfl01Scf02382g04034.1 | PhWRKY79 | Nucleus | 154 | 9.41 | 17774.21 | C <sub>782</sub> H <sub>1242</sub> N <sub>228</sub> O <sub>234</sub> S <sub>6</sub>   |

---
